# Supplementary material
Source: Springer Nature journal article supplement (https://www.springermedizin.de/resource/supplementary/12879_2012_2055_MOESM1_ESM.pdf/9443568)

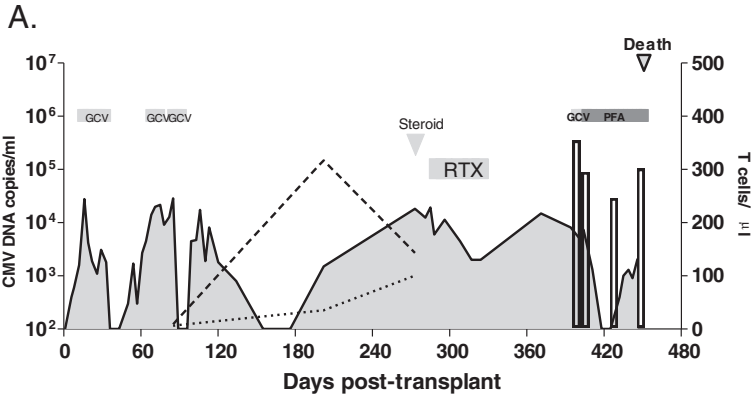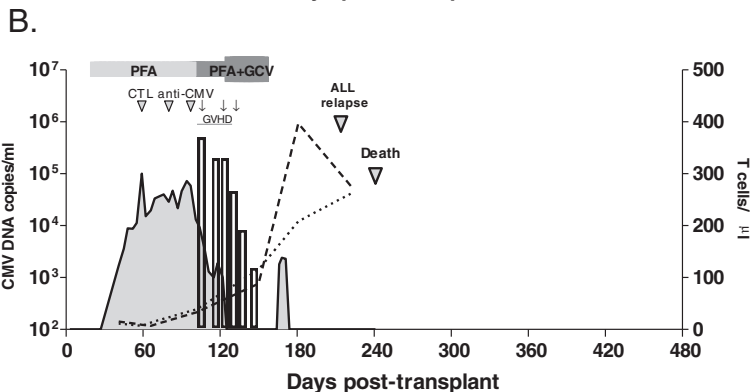

— CMV DNA in blood □ CMV DNA in CSF ..... CD4 --- CD8 ↓ Aspecific human IgG

Supplement: MOESM1 [file 9443568]
